# Supplementary material for: Improving the Photocurrent in Quantum-Dot-Sensitized Solar Cells by Employing Alloy PbxCd1−xS Quantum Dots as Photosensitizers
Source: PubMed Central journal article supplement (PMC5302620; doi:10.3390/nano6060097), 2016-05-27
Supplement: nanomaterials-06-00097-s001.pdf [file nanomaterials-06-00097-s001.pdf]

# Supplementary Materials: Improved Photocurrent in Quantum Dot Sensitized Solar Cells by Employing Alloy $Pb_xCd_{1-x}S$ QDs as Photosensitizers

Chunze Yuan, Lin Li, Jing Huang, Zhijun Ning, Licheng Sun and Hans Ågren

**Table S1.** The photovoltaic parameters of quantum-dot-sensitized solar cells (QDSCs) employing 3 successive ionic-layer adsorption and reaction (SILAR) cycles of CdS, PbS, and PbCdS-1 as photosensitizers.

| Photosensitizer | $J_{sc}$ (mA/cm <sup>2</sup> ) | $V_{oc}$ (V) | FF   | $\eta$ (%) |
|-----------------|--------------------------------|--------------|------|------------|
| CdS(3c)         | 3.88                           | 0.48         | 0.50 | 0.93       |
| PbS(3c)         | 5.64                           | 0.24         | 0.51 | 0.69       |
| PbCdS-1(3c)     | 11.22                          | 0.28         | 0.49 | 1.54       |

**Table S2.** The concentrations of precursor solutions of cationic sources used in this work.

| QDs     | Cd <sup>2+</sup> (M) | Pb <sup>2+</sup> (M) |
|---------|----------------------|----------------------|
| PbS     | 0                    | 0.004                |
| PbCdS-1 | 0.1                  | 0.004                |
| PbCdS-2 | 0.1                  | 0.002                |
| PbCdS-3 | 0.1                  | 0.001                |
| CdS     | 0.1                  | 0                    |

**Table S3.** The concentrations of Pb and Cd in  $Pb_xCd_{1-x}S$  QDs were assayed by Inductively Coupled Plasma Atomic Emission Spectrometry (ICP-AES).

| Concentrations                 | PbCdS-1                                 | PbCdS-2                                 | PbCdS-3                                 |
|--------------------------------|-----------------------------------------|-----------------------------------------|-----------------------------------------|
| Concentration Cd ( $\mu$ g/mL) | 29.03                                   | 39.14                                   | 37.69                                   |
| Concentration Pb ( $\mu$ g/mL) | 61.95                                   | 32.25                                   | 21.49                                   |
| Calculated Chemical formula    | Pb <sub>0.54</sub> Cd <sub>0.46</sub> S | Pb <sub>0.31</sub> Cd <sub>0.69</sub> S | Pb <sub>0.24</sub> Cd <sub>0.76</sub> S |

**Table S4.** The photovoltaic parameters of QDSCs depending on the number of SILAR cycles, employing CdS, PbS, and  $Pb_xCd_{1-x}S$  as photosensitizers; short-circuit current:  $J_{sc}$ , open-circuit voltage:  $V_{oc}$ , fill factor: FF, efficiency:  $\eta$ .

| Photosensitizer | $J_{sc}$ (mA/cm <sup>2</sup> ) | $V_{oc}$ (V) | FF   | $\eta$ (%) |
|-----------------|--------------------------------|--------------|------|------------|
| PbS(3c)         | 5.16                           | 0.255        | 0.52 | 0.69       |
| PbS(5c)         | 3.97                           | 0.205        | 0.54 | 0.44       |
| PbCdS-1(3c)     | 12.04                          | 0.330        | 0.35 | 1.40       |
| PbCdS-1(5c)     | 15.92                          | 0.315        | 0.39 | 1.96       |
| PbCdS-1(7c)     | 19.40                          | 0.375        | 0.37 | 2.71       |
| PbCdS-1(9c)     | 15.22                          | 0.330        | 0.40 | 2.00       |
| PbCdS-2(3c)     | 6.77                           | 0.405        | 0.47 | 1.28       |
| PbCdS-2(5c)     | 12.32                          | 0.415        | 0.40 | 2.07       |
| PbCdS-2(7c)     | 15.80                          | 0.395        | 0.45 | 2.80       |
| PbCdS-2(9c)     | 13.66                          | 0.385        | 0.45 | 2.37       |
| PbCdS-3(3c)     | 4.02                           | 0.420        | 0.56 | 0.94       |
| PbCdS-3(5c)     | 8.66                           | 0.410        | 0.47 | 1.68       |
| PbCdS-3(7c)     | 10.09                          | 0.420        | 0.47 | 1.99       |
| PbCdS-3(9c)     | 10.81                          | 0.435        | 0.50 | 2.36       |
| PbCdS-3(11c)    | 9.19                           | 0.42         | 0.51 | 1.98       |

Table S4. Cont.

| Photosensitizer | $J_{sc}$ (mA/cm <sup>2</sup> ) | $V_{oc}$ (V) | $FF$ | $\eta$ (%) |
|-----------------|--------------------------------|--------------|------|------------|
| CdS(3c)         | 3.93                           | 0.485        | 0.51 | 0.97       |
| CdS(5c)         | 5.50                           | 0.480        | 0.52 | 1.36       |
| CdS(7c)         | 7.50                           | 0.515        | 0.42 | 1.63       |
| CdS(9c)         | 9.94                           | 0.52         | 0.40 | 2.06       |
| CdS(11c)        | 9.92                           | 0.53         | 0.47 | 2.49       |

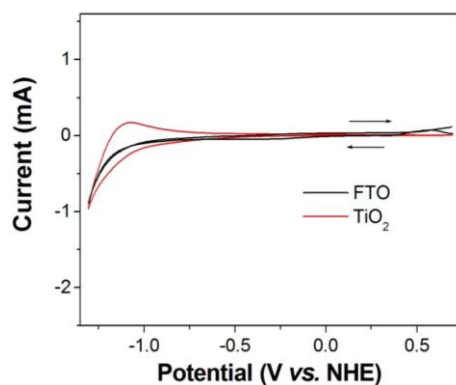

**Figure S1.** Cyclic voltammograms of the bare fluorine-doped tin oxide (FTO) glass and TiO<sub>2</sub> electrode measured under the same condition with Figure 3.

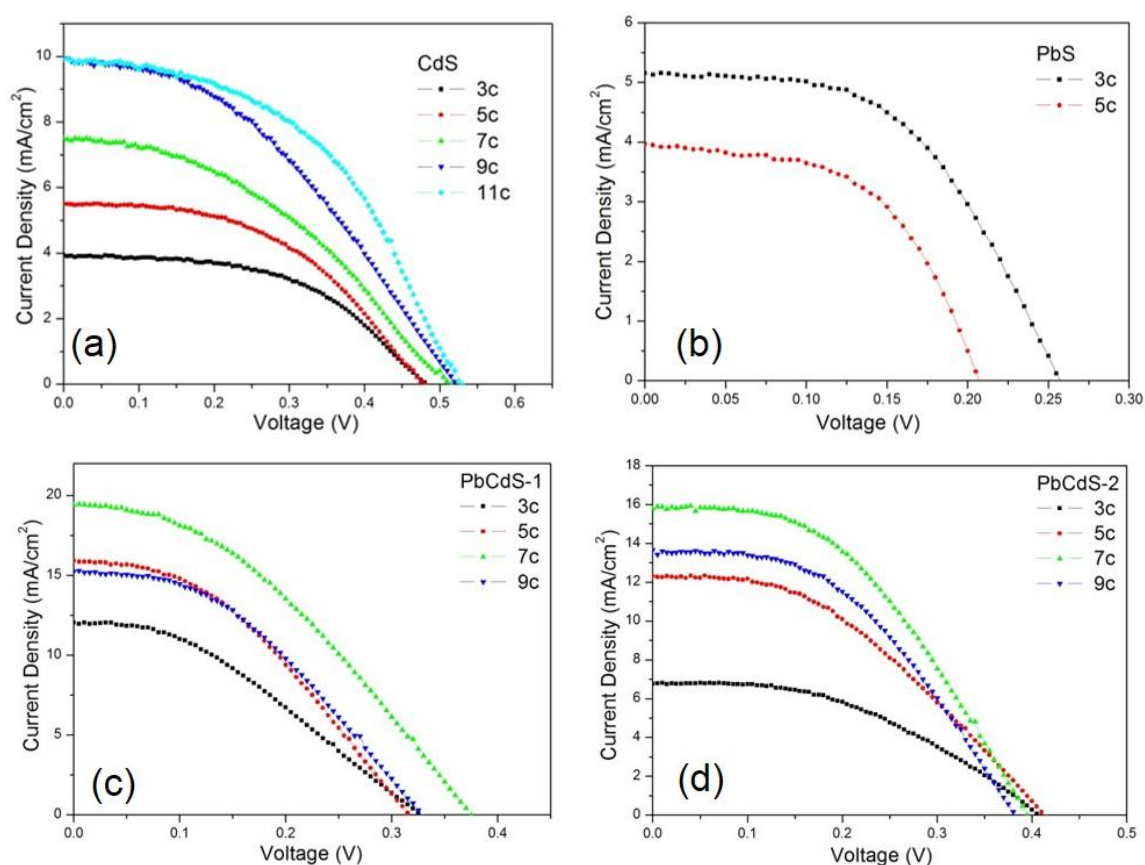

**Figure S2.** Cont.

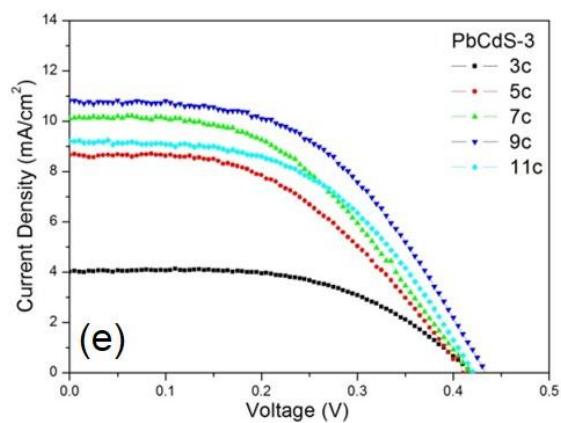

**Figure S2.** I–V curves of QDSCs depending on the number of SILAR cycles, employing (a) CdS; (b) PbS; (c) PbCdS-1; (d) PbCdS-2; (e) PbCdS-3 as photosensitizer.

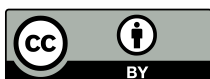

© 2016 by the authors; licensee MDPI, Basel, Switzerland. This article is an open access article distributed under the terms and conditions of the Creative Commons by Attribution (CC-BY) license (<http://creativecommons.org/licenses/by/4.0/>).
